# Supplementary material for: Effects of horizontal resolution and air-sea coupling on simulatedmoisture sources for regional East Asian precipitation
Source: Copernicus journal article supplement (doi:10.5194/gmd-2020-104), 2020-05-08
Supplement: Supplementary file [file gmd-2020-104-AC1-supplement.pdf]

Astrid Kerkweg

a.kerkweg@fz-juelich.de

Received and published: 25 May 2020

Thank you for reminding us to comply with the GMD requirements. We will make the following modifications to the manuscript.

Dear authors,

in my role as Executive editor of GMD, I would like to bring to your attention our Editorial version 1.2: <https://www.geosci-model-dev.net/12/2215/2019/>

This highlights some requirements of papers published in GMD, which is also available on the GMD website in the 'Manuscript Types' section:

[http://www.geoscientific-model-development.net/submission/manuscript\\_types.html](http://www.geoscientific-model-development.net/submission/manuscript_types.html)

In particular, please note that for your paper, the following requirements have not been met in the Discussions paper:

- The main paper must give the model name and version number (or other unique identifier) in the title.

We have added the model name and version numbers to the title and abstract. The new title will be: *"Effects of horizontal resolution and air-sea coupling on simulated moisture source for East Asian precipitation in MetUM GA6.0/GC2.0"*.

- "Code must be published on a persistent public archive with a unique identifier for the exact model version described in the paper or uploaded to the supplement, unless this is impossible for reasons beyond the control of authors. All papers must include a section, at the end of the paper, entitled "Code availability". Here, either instructions for obtaining the code, or the reasons why the code is not available should be clearly stated. It is preferred for the code to be uploaded as a supplement or to be made available at a data repository with an associated DOI (digital object identifier) for the exact model version described in the paper. Alternatively, for established models, there may be an existing means of accessing the code through a particular system. In this case, there must exist a means of permanently accessing the precise model version described in the paper. In some cases, authors may prefer to put models on their own website, or to act as a point of contact for obtaining the code. Given the impermanence of websites and email addresses, this is not encouraged, and authors should consider improving the availability with a more

permanent arrangement. Making code available through personal websites or via email contact to the authors is not sufficient. After the paper is accepted the model archive should be updated to include a link to the GMD paper."

We have made the code and data as available as possible. We will add the following information in the Code and Data availability Section: "*For WAM-2layers, the model code is available at <https://github.com/ruudvdent/WAM2layersPython/tree/distance/>. For MetUM, the code is available only under license from the Met Office. The data used to produce the figures in this study have been published at <https://doi.org/10.6084/m9.figshare.12801278>."*

Therefore, please name the MetUM including its version number (as named in Sect.2.2) in the title of your article and provide your code publicly or provide the reasons why the code cannot be made publicly available in your revised submission to GMD.

Yours,

Astrid Kerkweg
